# Supplementary material
Source: ML conference proceedings conference paper supplement (https://openaccess.thecvf.com/content/CVPR2021/html/Quach_DyGLIP_A_Dynamic_CVPR_2021_paper.html)
Supplement: Supplementary file 2 [file Quach_DyGLIP_A_Dynamic_CVPR_2021_supplemental.zip]

Archive with 4 entries (4 files):
- 06241_supp.mp4
- __MACOSX/._06241_supp.mp4
- 06241_supp.pdf
- __MACOSX/._06241_supp.pdf
